# Supplementary material
Source: PubMed Central journal article supplement (PMC4579646)
Supplement: cmi201461x1.pdf [file cmi201461x1.pdf]

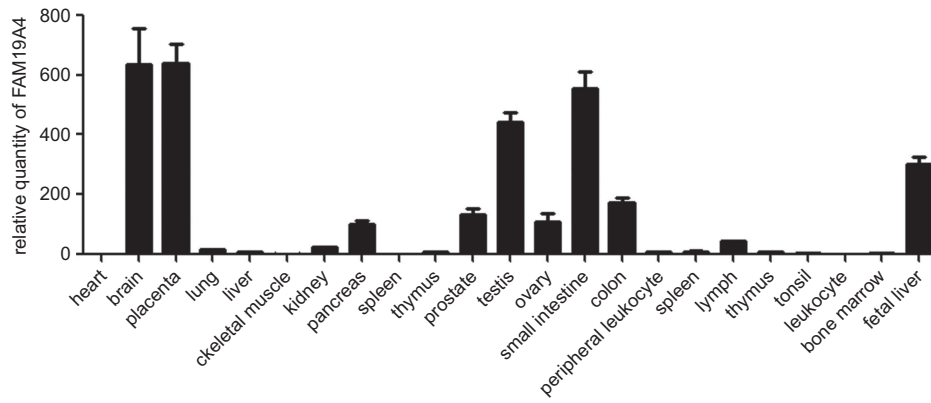

**Supplemental Figure 1** The expression profile of FAM19A4 was analyzed using real-time PCR in normal human tissues.

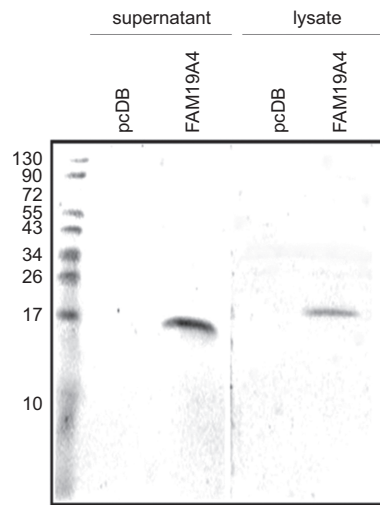

**Supplemental Figure 2** The cell lysate and the supernatant of the transfected HEK293 cells were detected with polyclonal anti-FAM19A4 antibody (1  $\mu\text{g/ml}$ ).

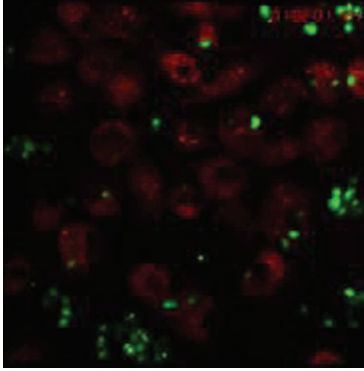

**Supplemental Movie 1** Phagocytosis of resting human macrophages against zymosan for 2 h.

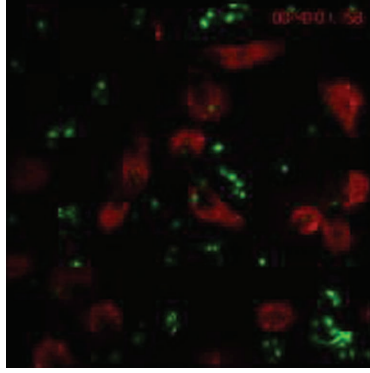

**Supplemental Movie 2** Phagocytosis of FAM19A4-treated human macrophages against zymosan for 2 h.
